# Supplementary material
Source: bioRxiv or medRxiv preprint supplement (https://www.biorxiv.org/content/biorxiv/early/2021/01/19/2021.01.18.427196.1/DC1/embed/media-1.pdf)
Supplement: Supplementary file [file media-1.pdf]

1 **Supplementary material**

2 **Table S1.** Primary and secondary (host species for *Muehlenbeckia sp.*) plant species used for  
 3 nest site selection across each breeding season.

| Plant species                                        | 2012     |             | 2013     |             | 2014     |             | 2015     |             | 2016     |             |
|------------------------------------------------------|----------|-------------|----------|-------------|----------|-------------|----------|-------------|----------|-------------|
|                                                      | <i>N</i> | %           | <i>N</i> | %           | <i>N</i> | %           | <i>N</i> | %           | <i>N</i> | %           |
| <b>Primary</b>                                       |          |             |          |             |          |             |          |             |          |             |
| <i>Muehlenbeckia australis/complexa</i>              | 22       | <b>42.3</b> | 16       | 19.8        | 20       | <b>37.0</b> | 19       | <b>27.5</b> | 31       | <b>27.7</b> |
| <i>Cordyline australis</i>                           | 9        | 17.3        | 34       | <b>42.0</b> | 10       | 18.5        | 7        | 10.1        | 24       | 21.4        |
| <i>Kunzea ericoides</i>                              | 5        | 9.6         | 6        | 7.4         | 1        | 1.9         | 5        | 7.2         | 8        | 7.1         |
| Unknown                                              | 5        | 9.6         | 0        | 0.0         | 0        | 0.0         | 4        | 5.8         | 20       | 17.9        |
| <i>Melicytus ramiflorus</i>                          | 3        | 5.8         | 6        | 7.4         | 7        | 13.0        | 5        | 7.2         | 10       | 8.9         |
| <i>Metrosideros excelsa</i>                          | 3        | 5.8         | 3        | 3.7         | 13       | 24.1        | 15       | 21.7        | 12       | 10.7        |
| <i>Knightia excelsa</i>                              | 2        | 3.8         | 3        | 3.7         | 1        | 1.9         | 3        | 4.3         | 1        | 0.9         |
| <i>Phormium tenax</i>                                | 1        | 1.9         | 6        | 7.4         | 1        | 1.9         | 3        | 4.3         | 1        | 0.9         |
| <i>Leptospermum scoparium</i>                        | 0        | 0.0         | 2        | 2.5         | 0        | 0.0         | 0        | 0.0         | 0        | 0.0         |
| <i>Myrsine australis</i>                             | 0        | 0.0         | 1        | 1.2         | 1        | 1.9         | 3        | 4.3         | 0        | 0.0         |
| Dead tree                                            | 0        | 0.0         | 1        | 1.2         | 0        | 0.0         | 2        | 2.9         | 0        | 0.0         |
| Other (<2% each)                                     | 2        | 3.8         | 3        | 3.7         | 0        | 0.0         | 3        | 4.3         | 5        | 4.5         |
| <b>Secondary</b><br>( <i>Muehlenbeckia sp.</i> host) |          |             |          |             |          |             |          |             |          |             |
| <i>Pittosporum crassifolium</i>                      | 8        | <b>36.4</b> | 1        | 7.1         | 0        | 0.0         | 2        | 14.3        | 0        | 0.0         |
| <i>Metrosideros excelsa</i>                          | 4        | 18.2        | 3        | 21.4        | 4        | <b>36.4</b> | 3        | 21.4        | 0        | 0.0         |
| <i>Cordyline australis</i>                           | 2        | 9.1         | 7        | <b>50.0</b> | 3        | 27.3        | 5        | <b>35.7</b> | 1        | 25          |
| <i>Kunzea ericoides</i>                              | 2        | 9.1         | 0        | 0.0         | 2        | 18.2        | 1        | 7.1         | 0        | 0.0         |
| <i>Coprosma sp.</i>                                  | 2        | 9.1         | 0        | 0.0         | 1        | 9.1         | 0        | 0.0         | 2        | <b>50.0</b> |
| <i>Paraserianthes lophantha</i>                      | 2        | 9.1         | 0        | 0.0         | 0        | 0.0         | 0        | 0.0         | 0        | 0.0         |
| <i>Melicytus ramiflorus</i>                          | 1        | 4.5         | 1        | 7.1         | 2        | 18.2        | 2        | 14.3        | 0        | 0.0         |
| Dead tree                                            | 1        | 4.5         | 1        | 7.1         | 0        | 0.0         | 1        | 7.1         | 1        | 25.0        |
| Unknown                                              | 0        | 0.0         | 1        | 7.1         | 0        | 0.0         | 0        | 0.0         | 0        | 0.0         |
| <i>Vitex lucens</i>                                  | 0        | 0.0         | 0        | 0.0         | 1        | 9.1         | 0        | 0.0         | 0        | 0.0         |

4

5 Note: Most commonly used species highlighted in bold for each breeding season.
